# Supplementary material for: Spatial and temporal axes impact ecology of the gut microbiome in juvenile European lobster (Homarus gammarus)
Source: PubMed Central journal article supplement (PMC6976562; doi:10.1038/s41396-019-0546-1), 2019-11-01

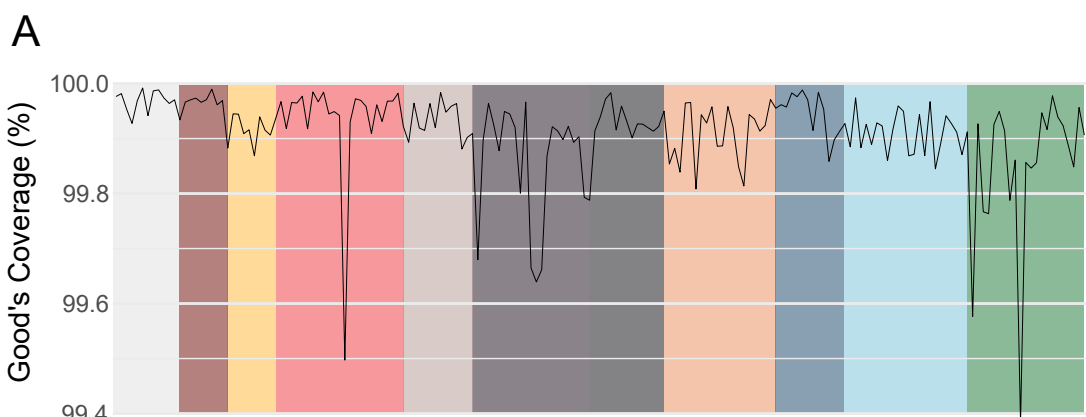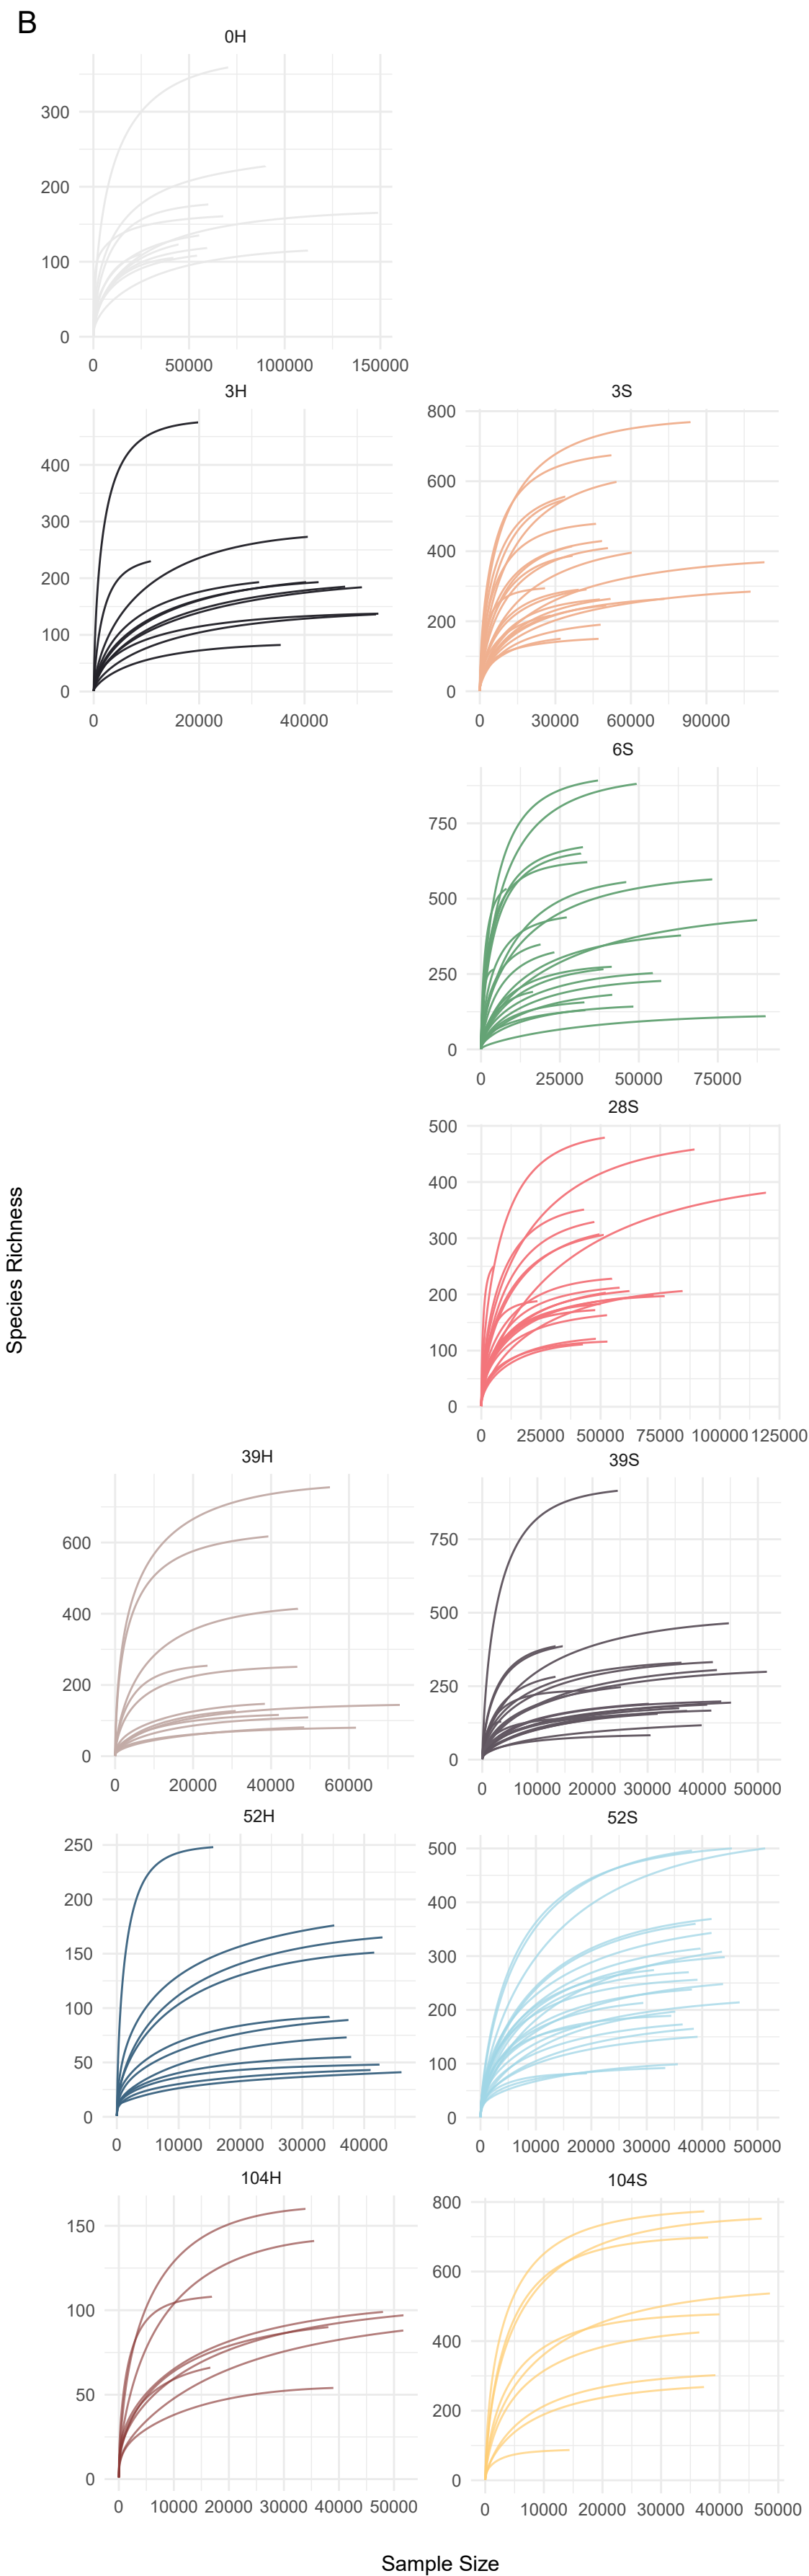

Supplement: 41396_2019_546_MOESM3_ESM.pdf [file 41396_2019_546_MOESM3_ESM.pdf]
